# Supplementary material for: Geometrical stabilities and electronic properties of Sin(n = 12–20) clusters with rare earth holmium impurity: a density functional investigation
Source: Royal Society of Chemistry journal article supplement (doi:10.1039/c4ra11828f), 2014-11-03
Supplement: c4ra11828f1.pdf [file c4ra11828f1.pdf]

12a&12b

Si, 0, 1. 7975793407, 1. 1014411409, 1. 5499112651  
Si, 0, -0. 0966624991, 2. 4633124433, 1. 034907624  
Si, 0, -2. 0409959173, 1. 1003307729, 0. 8933766988  
Si, 0, -1. 9761076321, -1. 1557268432, 1. 872466833  
Si, 0, -0. 0286635249, -2. 3100806845, 0. 9026857633  
Si, 0, 2. 076126859, -1. 2137390411, 0. 9683743194  
Si, 0, 2. 9371607186, 1. 6399781845, -0. 5827274939  
Si, 0, 0. 9111744185, 2. 808884213, -1. 1717953981  
Si, 0, -2. 9731899366, 0. 7453438176, -1. 2706785817  
Si, 0, -2. 6720715218, -1. 5503914994, -0. 4946248536  
Si, 0, -0. 8366926414, -2. 9467113881, -1. 2529279371  
Si, 0, 2. 9375909297, -0. 6988459091, -1. 2536763091  
Ho, 0, 0. 0570277586, 0. 0162047931, -1. 3622287552

12c

Si, 0, 1. 7975793407, 1. 1014411409, 1. 5499112651  
Si, 0, -0. 0966624991, 2. 4633124433, 1. 034907624  
Si, 0, -2. 0409959173, 1. 1003307729, 0. 8933766988  
Si, 0, -1. 9761076321, -1. 1557268432, 1. 872466833  
Si, 0, -0. 0286635249, -2. 3100806845, 0. 9026857633  
Si, 0, 2. 076126859, -1. 2137390411, 0. 9683743194  
Si, 0, 2. 9371607186, 1. 6399781845, -0. 5827274939  
Si, 0, 0. 9111744185, 2. 808884213, -1. 1717953981  
Si, 0, -2. 9731899366, 0. 7453438176, -1. 2706785817  
Si, 0, -2. 6720715218, -1. 5503914994, -0. 4946248536  
Si, 0, -0. 8366926414, -2. 9467113881, -1. 2529279371  
Si, 0, 2. 9375909297, -0. 6988459091, -1. 2536763091  
Ho, 0, 0. 0570277586, 0. 0162047931, -1. 3622287552

12d

Si, 0, 1. 5338297297, -2. 0092930834, 0. 0262924883  
Si, 0, -0. 1615790483, -2. 0035130617, 1. 7606382217  
Si, 0, -0. 1651783865, -1. 8992589556, -1. 661443444  
Si, 0, -1. 8881121711, -1. 8908982949, 0. 0448960203  
Si, 0, 3. 2888273357, -0. 3980473822, -0. 1852629138  
Si, 0, -0. 0112060186, -0. 2738985837, 3. 432773853  
Si, 0, 0. 1390743046, -0. 1953476588, -3. 3110127394  
Si, 0, -3. 445785627, -0. 0522762607, 0. 0190125408  
Si, 0, 2. 1269093012, 0. 8920302868, -2. 0883864952  
Si, 0, -1. 9049113978, 0. 6160358783, 1. 9541854864  
Si, 0, -1. 8778276702, 0. 5323824638, -2. 0272721929  
Si, 0, 2. 0630041208, 0. 2734352105, 1. 8868705312  
Ho, 0, 0. 0708385276, 0. 8819354417, -0. 0165883562

13a

Si, 0, 2. 0516308563, 2. 6641428173, 1. 5653897852

Si, 0, -0.1252672557, 3.3180654664, 1.0070558398  
Si, 0, -2.2011967331, 2.3328047821, 1.4212670875  
Si, 0, -1.8537401508, -2.1357788431, 1.3813577668  
Si, 0, 0.0293317271, -2.9211696601, 0.0737359156  
Si, 0, 2.071044168, -2.1143551481, 1.1380138614  
Si, 0, 2.1311370358, 1.677687434, -0.6446927606  
Si, 0, 0.1167193021, 1.2626131163, -1.8584926289  
Si, 0, -2.0182036927, 1.3665200803, -0.8324659799  
Si, 0, -2.0935940043, -1.0535419392, -0.7383687611  
Si, 0, -1.0372474234, -2.8185343029, -2.3079627641  
Si, 0, 2.3777482203, -0.7220062549, -0.7640881163  
Si, 0, 0.5614580957, -1.0293767328, -2.3798987124  
Ho, 0, 0.0824562066, 0.1729291848, 1.4632220865

13b

Si, 0, 1.7962989341, 1.3880469865, -2.5346728699  
Si, 0, 2.2815427601, -2.0862737193, 0.0574124024  
Si, 0, 2.1715127597, -1.0990743579, -2.1456710077  
Si, 0, -0.1542040321, -1.0393587357, -2.8752788295  
Si, 0, -2.0747140737, -1.431975696, -1.3806726142  
Si, 0, -0.2367089135, -1.0916212211, 2.8992652451  
Si, 0, -1.8417606603, -1.2162028182, 1.0103598004  
Si, 0, 2.139733022, -0.9086483421, 2.1024026859  
Si, 0, 1.6755064501, 1.5378207155, 2.5523313424  
Si, 0, -0.6087834702, 1.4755595382, -3.1021154277  
Si, 0, -2.2042678062, 1.0397010768, -1.3172359451  
Si, 0, -2.709022724, 1.1353148914, 1.1243283527  
Si, 0, -0.6843127266, 1.4372905108, 2.5022609431  
Ho, 0, 0.4175034807, 0.442690171, -0.0947110778

13c

Si, 0, 1.3589628625, -1.8759798495, 0.3189994204  
Si, 0, -0.5263783609, -2.2258186764, 1.8259552815  
Si, 0, -0.0503521605, -2.0896653144, -1.5697550304  
Si, 0, -1.9787594846, -2.102527321, -0.1094562543  
Si, 0, 3.1823869872, -0.4171917531, -0.3233842242  
Si, 0, -1.0317162914, -0.7615300029, 3.6806969363  
Si, 0, 0.0483736259, -0.0881266648, -2.8223289241  
Si, 0, -3.6267808235, -0.3236370032, -0.2506590093  
Si, 0, 2.2829781716, 0.8237797459, -2.2776826895  
Si, 0, -2.3863348972, 0.1253658872, 1.9591341412  
Si, 0, -1.841536441, 0.8334131339, -1.8239818009  
Si, 0, 3.7972155258, 1.3924907005, 1.1940708466  
Si, 0, 2.270262833, 2.3658188863, -0.3706163723  
Ho, 0, -0.0098875469, 0.7234612315, 0.3780906791

13d Si, 0, 2.8974617669, 1.6011396512, 0.0241164793

Si, 0, -2. 9964351136, 1. 3220128072, 0. 1458648896  
Si, 0, -2. 6622550589, 0. 9783472974, 2. 3947103429  
Si, 0, 1. 888951457, 1. 1540784236, -2. 1309442227  
Si, 0, -2. 0403918321, 0. 9662242488, -2. 0497922616  
Si, 0, 2. 7046018906, 1. 2281850961, 2. 2847851727  
Si, 0, 2. 0450178644, -0. 9741186385, -1. 0893151719  
Si, 0, -1. 9527715742, -1. 1632867467, -1. 001972706  
Si, 0, 0. 1048427348, -2. 2761370073, -0. 9680235233  
Si, 0, -0. 1483071464, 2. 5760299069, -2. 0907854767  
Si, 0, -2. 3600440955, -1. 389456961, 1. 4756864453  
Si, 0, 2. 5770846348, -1. 1555128933, 1. 3678652934  
Si, 0, 0. 1393444826, -1. 8904956952, 1. 4596753554  
Ho, 0, -0. 0107300103, 0. 8237565109, 0. 4603113837

14a

Si, 0, 2. 2198493466, 1. 4714961234, 1. 424110604  
Si, 0, -1. 6618345297, 0. 9497594239, 2. 6324738006  
Si, 0, 1. 2420122708, -1. 7045354908, 1. 4876130648  
Si, 0, -2. 4459997315, -1. 0568559247, 1. 4881180858  
Si, 0, 1. 7980882569, 2. 2341384738, -1. 3290248343  
Si, 0, -2. 1550771479, 0. 7922253224, -2. 2903785788  
Si, 0, 1. 9015143246, -0. 0102265013, -2. 0954549551  
Si, 0, -1. 3221746019, -2. 2379289106, -1. 5465102914  
Si, 0, 2. 8151744043, -0. 5658797603, 0. 0858623785  
Si, 0, -3. 3099923375, -0. 843016207, -0. 8129211946  
Si, 0, 1. 5198479628, 3. 6286126518, 0. 5371978353  
Si, 0, -0. 730339645, -2. 6358970582, 0. 7160514616  
Si, 0, 0. 6804327126, 0. 2168235898, 2. 863908363  
Si, 0, -0. 2310146911, -0. 7251443816, -3. 0666846613  
Ho, 0, -0. 3204838642, 0. 4864197974, -0. 1056200815

14b

Si, 0, 1. 6887280764, 0. 8321601506, 2. 4253635679  
Si, 0, 0. 2676518899, 2. 4045251536, 1. 260551264  
Si, 0, -1. 852939593, 2. 2614425457, 2. 4474999286  
Si, 0, -1. 5304214134, -1. 8653178742, 2. 3398638907  
Si, 0, 0. 4871707459, -2. 7610170603, 1. 2686160193  
Si, 0, 2. 2123223737, -1. 0741664537, 1. 1503760661  
Si, 0, 1. 6564696998, 0. 8079606864, -2. 470949453  
Si, 0, 0. 2456048948, 2. 3888792032, -1. 2984785911  
Si, 0, -1. 8935118631, 2. 235650879, -2. 4495379363  
Si, 0, -1. 5670750532, -1. 8968721269, -2. 287404563  
Si, 0, 0. 4676341309, -2. 7781548734, -1. 2395398912  
Si, 0, 2. 1891623017, -1. 0847358266, -1. 1752895184  
Si, 0, -0. 6267927559, 0. 3092028946, 3. 1609347081  
Si, 0, -0. 6752421081, 0. 2737131395, -3. 148743634

Ho, 0, -0.7690260267, -0.1358240294, 0.0067486362

14c

Si, 0, 2.5919504058, -0.2704083107, -1.0915756269  
Si, 0, 1.7296639669, -2.5317036348, -1.1841173068  
Si, 0, -0.7099877323, -2.6103493257, -1.2684393034  
Si, 0, -2.7854629907, -1.304533484, -1.4453756368  
Si, 0, -2.6119251305, 1.1778523619, -1.0260773981  
Si, 0, 1.8938149652, 2.0331566065, -1.4772805527  
Si, 0, -0.4435761614, 2.8081183633, -1.2553660874  
Si, 0, 2.7119168507, -0.0938563947, 1.3885587842  
Si, 0, 1.4373216223, -2.1660524018, 1.4042859816  
Si, 0, -0.9488007334, -2.6257854086, 1.1447632714  
Si, 0, -2.5438301409, 1.3417663606, 1.3990732439  
Si, 0, 1.6169580338, 2.1402432735, 1.0392623252  
Si, 0, -2.9118874993, -1.098553724, 1.1923532627  
Si, 0, -0.6403309795, 3.0136423595, 1.3128525197  
Ho, 0, -0.1492943244, 0.0168339318, -0.034860641

14d

Si, 0, 1.306364895, 2.0596723434, 2.1317722201  
Si, 0, -1.4128779917, 2.2694891418, 2.1878429966  
Si, 0, 1.3370104514, -2.0923847001, 2.1337951225  
Si, 0, -1.3614446322, -2.161549069, 2.1973388881  
Si, 0, 2.6413115957, 1.32812763, 0.0860057415  
Si, 0, -2.4765300446, 1.2680365771, 0.1125305299  
Si, 0, 2.5471981113, -1.2646946349, 0.1013062725  
Si, 0, -2.5292573272, -1.3265883636, 0.130040218  
Si, 0, 1.1291891662, 1.2053200558, -1.9064415526  
Si, 0, -1.2764082853, 1.3242942352, -2.0621801346  
Si, 0, 1.237251046, -1.3122494297, -2.0033985965  
Si, 0, -1.1644901022, -1.241806698, -1.9260792781  
Si, 0, 1.1884496623, 0.0007871377, 3.4518233997  
Si, 0, -1.1702558326, 0.0348215189, 3.3055152356  
Ho, 0, 0.0044892877, 0.0129383306, 0.5087356459

15a

Si, 0, 0.1359088533, 1.7926003717, 2.6589870912  
Si, 0, -2.0906045244, 0.855810981, 2.9118916368  
Si, 0, -1.1396481238, -1.3691131764, 2.7505016208  
Si, 0, 2.1864643019, 0.5515018734, 2.1251709669  
Si, 0, 1.2846228857, -1.692056869, 2.4194776986  
Si, 0, -0.1467711512, 3.1048526859, 0.7083605008  
Si, 0, 2.9234583326, 1.0096089078, -0.2185578028  
Si, 0, 0.8636806915, -2.8441662983, 0.3575045777  
Si, 0, -2.817741099, 0.6294903224, -0.9172001746  
Si, 0, -1.669432179, -2.6488420903, 0.8145272775

Si, 0, 0.3521581103, -2.2095273911, -1.9892491219  
Si, 0, 2.370666192, -1.1350621746, -1.2889380421  
Si, 0, 1.2439748255, 2.521991151, -1.2440537649  
Si, 0, -2.0777298119, -1.5858946658, -1.4054854445  
Si, 0, -1.3137372647, 2.4822882835, -1.3360570539  
Ho, 0, -0.1052700385, 0.0756438887, 0.179378834

15b

|    |                 |                 |                 |
|----|-----------------|-----------------|-----------------|
| Si | -2.134057963825 | -2.000978436425 | 1.172417047400  |
| Si | -2.066566117151 | -1.946957827098 | -1.189054172487 |
| Si | -0.112629025286 | -2.109849353560 | -2.424445029275 |
| Si | 1.990189546567  | -1.944431168433 | 1.139275603390  |
| Si | -0.091337661509 | -1.970009131524 | 2.251929254518  |
| Si | 1.895034892856  | -1.885749446101 | -1.201171297225 |
| Si | -2.940193353997 | 0.318328305860  | 1.156936558255  |
| Si | 0.205736141015  | 0.317651645516  | 3.002381681670  |
| Si | 2.442723049851  | 0.322085099683  | 1.971188976687  |
| Si | 2.459270303462  | 0.287617274993  | -2.142886821985 |
| Si | 0.181417763051  | 0.235190667411  | -3.094165383004 |
| Si | -1.419784800879 | 1.946743056584  | 2.155813125450  |
| Si | -1.421627430059 | 1.896069495455  | -2.319268256684 |
| Si | -2.976994213529 | 0.306697217070  | -1.271996217788 |
| Si | 2.476489070428  | 1.569078190523  | -0.083692978592 |
| Ho | -0.089078201183 | 0.103173010114  | -0.057557090329 |

15c

Si, 0, -0.2320679051, 1.5031269283, 2.4880960486  
Si, 0, 1.1751724519, -1.7938864758, 2.4149600379  
Si, 0, -0.9500696692, -0.808425038, 2.9161957129  
Si, 0, 1.5025854555, 2.0135629502, 0.7572436812  
Si, 0, 2.3248469072, -2.0773208872, 0.3716172556  
Si, 0, -1.9376439153, 2.1392379193, 0.7370621358  
Si, 0, -2.4348177435, -1.6937440456, 0.9213744383  
Si, 0, 1.9069540252, -0.0701555216, -2.6128181252  
Si, 0, -1.6548780213, 0.0267977178, -2.4942747446  
Si, 0, 0.1403132352, 1.5736993227, -2.5912910053  
Si, 0, 0.0772802618, -1.7433316511, -2.7868642685  
Si, 0, 2.9485063797, 0.2267236472, -0.3694414014  
Si, 0, -3.0670870158, 0.309540484, -0.4318439806  
Si, 0, -0.1183004402, 2.9818535454, -0.7052803091  
Si, 0, 0.3945283754, -3.2910562578, -0.8866174742  
Ho, 0, -0.0655717352, -0.382079004, -0.0150181915

15d

Si, 0, 2.8806497675, -0.3180639877, -1.214849875  
Si, 0, 1.5312686257, -2.3541683049, -1.201852035  
Si, 0, -0.8512572601, -2.7325587219, -1.23740946

Si, 0, -2. 6659883285, -1. 1445836834, -1. 3003589188  
Si, 0, -2. 7229736276, 1. 2963176957, -1. 3457385663  
Si, 0, 1. 8547960441, 1. 8941606843, -1. 519153202  
Si, 0, -0. 666561429, 2. 6221180365, -1. 5796052783  
Si, 0, 2. 8164780076, -0. 2630749536, 1. 3403370555  
Si, 0, 1. 4945302863, -2. 3155576843, 1. 3782508606  
Si, 0, -0. 8918782541, -2. 6672592283, 1. 3243330655  
Si, 0, -2. 7499745832, 1. 3411122318, 1. 2100614157  
Si, 0, 1. 7935728766, 1. 9605815456, 1. 5386299741  
Si, 0, -2. 7247746173, -1. 0991039871, 1. 2797329782  
Si, 0, -0. 7117503571, 2. 6838591072, 1. 4794736036  
Si, 0, 1. 0202999036, 3. 8480306988, -0. 0581267774  
Ho, 0, -0. 0699069024, 0. 0785611241, 0. 0043319952

16a

Si, 0, 1. 1842591824, 1. 2445966878, 2. 587001946  
Si, 0, -1. 2145475006, 1. 1664346631, 2. 5274483376  
Si, 0, 1. 2120854804, -1. 1513722426, 2. 5387921848  
Si, 0, -1. 1863789866, -1. 2301065893, 2. 5864547177  
Si, 0, 2. 0956802705, 2. 0951069643, 0. 5563409433  
Si, 0, 2. 1434281863, -2. 1160596807, 0. 5709982272  
Si, 0, -2. 134426245, 2. 1209116284, 0. 5496856868  
Si, 0, -2. 0843172915, -2. 09132262, 0. 5534889977  
Si, 0, 1. 6846227352, -0. 0720930802, -2. 5118267506  
Si, 0, -1. 6603072471, 0. 0631560848, -2. 5207730692  
Si, 0, 0. 079741759, 1. 7113935031, -2. 5814248062  
Si, 0, -0. 0544508192, -1. 7201478908, -2. 5733406892  
Si, 0, 3. 0163620477, -0. 0666328985, -0. 5375328302  
Si, 0, -3. 0037256307, 0. 0652474806, -0. 5547836041  
Si, 0, 0. 064051633, 2. 9523899594, -0. 5447393507  
Si, 0, -0. 0469729712, -2. 9531210541, -0. 5324772825  
Ho, 0, 0. 0048953976, 0. 002090003, 0. 0087745259

16b

Si, 0, -1. 9563090291, -2. 1102295594, 2. 5036684891  
Si, 0, 1. 8979862638, -2. 6341213061, 2. 3676286082  
Si, 0, 2. 2901514696, 1. 220271917, -1. 187147691  
Si, 0, -1. 5520374244, 1. 741449188, -1. 0533021763  
Si, 0, 1. 6638008014, -2. 5674558984, -2. 4841229742  
Si, 0, 2. 4569635973, 1. 2834883294, 1. 1522449532  
Si, 0, -2. 0453313452, -2. 0653863222, -2. 3583093797  
Si, 0, -1. 5365218882, 1. 8222007823, 1. 2913971209  
Si, 0, 0. 4459099646, 1. 1701679829, 2. 2914647512  
Si, 0, 0. 3010306377, 1. 2982039267, -2. 3616302683  
Si, 0, -0. 0324247558, -0. 9588006688, -3. 1691890131  
Si, 0, 0. 1708641998, -1. 076841465, 3. 10756402

Si, 0, -2. 9845574693, -0. 2033897735, -1. 1412123519  
Si, 0, -2. 8109033423, -0. 2675666058, 1. 2094727059  
Si, 0, 3. 1221259248, -1. 0691209167, 1. 0062889643  
Si, 0, 3. 1461104079, -1. 0341499725, -1. 3515385882  
Ho, 0, 0. 1048929389, -0. 7530550824, -0. 0137028994

16c

Si, 0, 2. 8182119765, -0. 8701866479, -1. 0658479092  
Si, 0, 1. 3803726773, -2. 7573988878, -1. 1690255807  
Si, 0, -1. 0053836134, -3. 3454315252, -1. 338834816  
Si, 0, -2. 546499412, -1. 4746226091, -1. 1704551956  
Si, 0, -3. 199003378, 0. 8119084373, -1. 2988461135  
Si, 0, 2. 8743232743, 1. 5231394971, -1. 2693829687  
Si, 0, -1. 5514202284, 2. 6129560051, -1. 2579100378  
Si, 0, 0. 8144468521, 2. 7648075876, -1. 208329482  
Si, 0, 3. 2620054448, -0. 9448937539, 1. 4228640332  
Si, 0, 1. 4993830348, -2. 6580500778, 1. 2646200737  
Si, 0, -0. 8610914006, -2. 8853135508, 1. 1438762632  
Si, 0, -2. 8900363965, 0. 742368522, 1. 1955923178  
Si, 0, 2. 4859307298, 1. 347751145, 1. 1985835071  
Si, 0, -2. 9212449823, -1. 6602644199, 1. 3001532904  
Si, 0, -1. 5030789691, 2. 6649386361, 1. 2144384633  
Si, 0, 0. 8949296792, 3. 1189090697, 1. 2796313014  
Ho, 0, -0. 0535072885, -0. 0211184275, 0. 0131268535

16d

Si, 0, 2. 7318140484, -0. 4604922847, -0. 7910156577  
Si, 0, 1. 7060502562, -2. 6707042694, -1. 3210993724  
Si, 0, -0. 7767494981, -2. 5486673957, -1. 4370868116  
Si, 0, -3. 1316669661, -1. 3170709637, -0. 7354986848  
Si, 0, -2. 8468034591, 1. 0775271988, -0. 9533558747  
Si, 0, 2. 3814997176, 1. 9669881095, -0. 6874189288  
Si, 0, -1. 2183940686, 1. 7735108758, -2. 5840902585  
Si, 0, 2. 4850597574, -0. 8110267705, 1. 6384733064  
Si, 0, 1. 198401179, -2. 8298038229, 1. 2085074974  
Si, 0, -1. 2097163931, -2. 8178889559, 1. 2531804073  
Si, 0, -2. 2909874432, 1. 3635563837, 1. 4598991026  
Si, 0, 1. 8552752808, 1. 5233373805, 1. 7514215789  
Si, 0, -2. 7418679415, -0. 9921623082, 1. 6639622158  
Si, 0, -0. 3023395357, 2. 6140321449, 1. 5617450313  
Si, 0, -2. 6543757014, -3. 9269184497, -0. 714324971  
Si, 0, 0. 1224383286, 2. 8393070374, -0. 872669146  
Ho, 0, -0. 1098065612, -0. 1623549099, 0. 005796566

17a

Si, 0, -1. 1970396613, -2. 8555923616, 1. 1808958198  
Si, 0, 1. 1840171967, -2. 696996908, -1. 2572745825

Si, 0, -2. 0859691279, -0. 9005076137, 2. 1267863405  
Si, 0, -2. 3199095712, -0. 7342507153, -2. 149588008  
Si, 0, 2. 0970007264, -0. 8992433266, 2. 1100420918  
Si, 0, 2. 2359136149, -0. 7396449517, -2. 2279463589  
Si, 0, -1. 229265205, -2. 6567465516, -1. 1655654225  
Si, 0, 1. 1912904311, -2. 8070134271, 1. 1011394358  
Si, 0, -0. 0031496859, -0. 0270400201, 3. 0200723711  
Si, 0, -0. 0803955498, 0. 0472305693, -2. 9907217644  
Si, 0, 2. 86334161, 0. 4322069155, 0. 1006640669  
Si, 0, -2. 8767184618, 0. 3970591184, 0. 125488181  
Si, 0, -0. 0159459258, 2. 1118772553, 2. 1566150477  
Si, 0, 0. 5123140797, 2. 3343684245, -3. 1042403732  
Si, 0, 1. 8222571171, 2. 5957711876, 0. 5939730363  
Si, 0, -1. 8791408196, 2. 5614847162, 0. 6164750643  
Si, 0, -0. 0589628607, 2. 901848624, -0. 9026090065  
Ho, 0, 0. 000977093, -0. 0464009351, -0. 0162543393

17b

Si, 0, -1. 8675493889, -2. 1106880919, 2. 1068198523  
Si, 0, 1. 878292233, -2. 723070971, 2. 0541642774  
Si, 0, 2. 2758067576, 1. 24709369, -1. 2824695531  
Si, 0, -1. 6283178188, 1. 8169597472, -1. 1691978777  
Si, 0, 1. 7346930839, -2. 680928403, -2. 2557292891  
Si, 0, 2. 3562195443, 1. 223396143, 1. 124220215  
Si, 0, -2. 0060490939, -2. 070066709, -2. 0458996243  
Si, 0, -1. 5463673489, 1. 7928243552, 1. 2827661118  
Si, 0, -1. 2596561239, -3. 2395389369, -0. 0033532266  
Si, 0, 0. 3953549096, 1. 101578261, 2. 4038325185  
Si, 0, 0. 2338481321, 1. 1488300632, -2. 4304922208  
Si, 0, 0. 0155675109, -1. 2219527817, -3. 1112266249  
Si, 0, 0. 2212758817, -1. 2821503853, 3. 0512160335  
Si, 0, -3. 0406926088, -0. 1253890328, -1. 1265721147  
Si, 0, -2. 9596614181, -0. 1491773499, 1. 2962627245  
Si, 0, 3. 286406995, -1. 0123362273, 1. 0612724398  
Si, 0, 3. 2066269928, -0. 9887808629, -1. 3255929151  
Ho, 0, 0. 188110393, -0. 7251366023, -0. 0272084553

17c

Si, 0, 1. 3127741998, 2. 578037457, -2. 4460695794  
Si, 0, 1. 5336586761, 2. 1598343478, 1. 6388483564  
Si, 0, 2. 3597905428, 0. 4945970021, -2. 8854792804  
Si, 0, 2. 8501503163, 0. 1291424773, 1. 156494336  
Si, 0, -1. 7987352153, 3. 0109756186, -0. 6158149009  
Si, 0, -2. 5899672757, 1. 1485073242, -2. 0665847443  
Si, 0, 0. 0523143514, 0. 7809557977, -3. 6204382335  
Si, 0, -3. 0881786588, 1. 2516285781, 0. 3184783151



Si, 0, 0.0926390656, 0.5123410297, 2.7785373492  
Si, 0, 0.5584939438, 3.1973229766, -0.2644217186  
Si, 0, -1.9539727835, -0.1896182419, 1.7756255925  
Si, 0, 2.7934685369, -0.8495695468, -1.0169941779  
Si, 0, -1.7186841538, -0.8337499767, -3.183319095  
Si, 0, -0.890210319, -2.8093458593, -1.3077478825  
Si, 0, 1.2296638101, -1.6687913235, 2.0265666735  
Si, 0, -1.1580886084, -2.3261685383, 1.1099737724  
Si, 0, 1.4154495119, -2.6838586339, -0.4041376479  
Ho, 0, 0.0214850597, 0.2453135112, -0.478000135

17d

Si, 0, 3.0357049193, -0.9309230433, -0.9555577132  
Si, 0, 1.3543753807, -2.6539398053, -1.0635576538  
Si, 0, -0.9953769607, -3.2354766056, -1.2884591566  
Si, 0, -2.6453141397, -1.4276619385, -1.1543803005  
Si, 0, -3.3402676094, 0.8857002763, -1.3852565563  
Si, 0, 2.5812707388, 1.3361069798, -1.5522498243  
Si, 0, -1.5345013758, 2.5629342618, -1.3227447224  
Si, 0, 0.7921931045, 2.8415748944, -1.6244708341  
Si, 0, 3.8438646585, -1.0345136114, 1.5198920437  
Si, 0, 1.6262178358, -2.3978299221, 1.3138755522  
Si, 0, -0.7357690822, -2.7298561607, 1.2225657591  
Si, 0, -2.9484507945, 0.8602462455, 1.0792389663  
Si, 0, 2.3831505816, 0.8997841362, 1.1185849315  
Si, 0, -2.8614231996, -1.5338160658, 1.3254909894  
Si, 0, -1.5195797148, 2.7893470256, 1.1225000426  
Si, 0, 0.7859330905, 2.5404860274, 1.8680285901  
Si, 0, 2.6462195328, 3.4663365201, 0.2489573178  
Ho, 0, -0.1699089659, 0.0209997857, -0.2182034316

18a

Si, 0, 2.7428632352, -0.1808991069, -1.2062959252  
Si, 0, 1.5935860166, -2.3610600069, -1.1659722244  
Si, 0, -0.8438952513, -2.6619471944, -1.1937103285  
Si, 0, -2.760776586, -1.1626315508, -1.2818494837  
Si, 0, -2.4932187652, 1.2575411473, -1.313909978  
Si, 0, 1.7867196209, 2.0866813971, -1.2750394511  
Si, 0, -0.5749212599, 2.7920928364, -1.3248966782  
Si, 0, 2.6749629183, -0.1934790666, 1.2588631561  
Si, 0, 1.5913776325, -2.4574097356, 1.3992519696  
Si, 0, -0.9000036823, -2.5937672522, 1.2508542033  
Si, 0, -2.5403465519, 1.2949902663, 1.1315332937  
Si, 0, 1.6785048048, 2.176619736, 1.1873225562  
Si, 0, -2.9250437379, -1.1539232086, 1.3229085131

Si, 0, -0.7006646223, 2.9858292968, 1.2318033695  
Ho, 0, -0.0926136192, 0.0017330147, 0.0771938433

18b

|    |                 |                 |                 |
|----|-----------------|-----------------|-----------------|
| Si | -0.830653995643 | -2.289217950583 | -2.084694708270 |
| Si | -2.269773332277 | -0.393881021767 | -2.321192968076 |
| Si | -1.366830115561 | 1.861818703927  | -2.089195367362 |
| Si | 0.918709034275  | 2.295319378838  | -1.560918065065 |
| Si | 2.378593780982  | 0.491304158094  | -2.121992082802 |
| Si | 1.498600314260  | -1.866018141854 | -2.086827511518 |
| Si | -2.285992197550 | -0.390633573968 | 2.302999142749  |
| Si | -0.849246325071 | -2.288683609481 | 2.075796397172  |
| Si | 1.479689655451  | -1.865505981423 | 2.101354056530  |
| Si | 2.358650283627  | 0.493362138536  | 2.144251728635  |
| Si | 0.907457893009  | 2.298697974383  | 1.564374789885  |
| Si | -1.382005541525 | 1.865574559251  | 2.076316947614  |
| Si | -2.044603233381 | -2.813975129978 | -0.009721747815 |
| Si | -3.457640587296 | -0.482039241683 | -0.012583577946 |
| Si | -2.593856489558 | 1.874327556873  | -0.010905285210 |
| Si | 1.527994276470  | 4.085574400325  | 0.001996551778  |
| Si | 3.364046078370  | -0.072946239440 | 0.016127819677  |
| Si | 2.599735229581  | -2.369776618379 | 0.012368698492  |
| Ho | -0.040598728164 | -0.186340761668 | -0.000296818470 |

18c

Si, 0, -1.8342730846, -2.1109102074, 2.0683223218  
Si, 0, 1.8912385369, -2.7692522161, 2.087262872  
Si, 0, 2.1933602804, 1.2445906165, -1.2818749579  
Si, 0, -1.637452054, 1.8883558286, -1.4381464134  
Si, 0, 1.7480518454, -2.7265060766, -2.2938221909  
Si, 0, 2.2717595118, 1.2212059082, 1.1274900796  
Si, 0, -1.9705855842, -2.0702651831, -2.0102547414  
Si, 0, -1.5367521403, 1.8587279934, 1.5514983919  
Si, 0, -1.1978423187, -3.3941986498, -0.0067619995  
Si, 0, -1.3759216324, 3.7445050942, 0.0687127288  
Si, 0, 0.4118721008, 1.0937440893, 2.5832512097  
Si, 0, 0.2386020902, 1.1431285196, -2.6090851662  
Si, 0, 0.018512304, -1.2323983126, -3.0804200469  
Si, 0, 0.2210759137, -1.2918757997, 3.0201032626  
Si, 0, -2.881498467, -0.1016918924, -1.0871970054  
Si, 0, -2.8054557134, -0.1240471974, 1.2513852045  
Si, 0, 3.1698126121, -1.0104093869, 1.0504904358  
Si, 0, 3.0924312568, -0.9885729764, -1.3058340123  
Ho, 0, 0.0910515426, -0.6281591516, -0.0235949727

## 18d

Si, 0, 1. 4628128248, 1. 0873560345, 1. 395351667  
 Si, 0, 3. 9316281987, 0. 8866678171, 1. 7575928354  
 Si, 0, 1. 1922642792, -1. 4283021774, 1. 3714562422  
 Si, 0, 1. 3530961071, 1. 1859887326, -1. 4038140173  
 Si, 0, -0. 2812954099, 2. 9823790674, -1. 4850293154  
 Si, 0, -2. 6491706009, 2. 2077278932, -1. 3920578614  
 Si, 0, -2. 8228412125, -2. 1467321863, -1. 2040468844  
 Si, 0, 3. 7282539427, 0. 9698352466, -0. 7272555243  
 Si, 0, -3. 7763236982, 0. 0829602443, -1. 3507966473  
 Si, 0, -0. 4863381957, -2. 9976821541, -1. 1535144687  
 Si, 0, 1. 3551192964, -1. 3445451419, -1. 4263700363  
 Si, 0, 3. 587958222, -1. 4645207815, 0. 7331364995  
 Si, 0, -0. 1866460804, 2. 927270835, 1. 0946944086  
 Si, 0, -2. 6020427787, 2. 3329651171, 1. 1076228591  
 Si, 0, -3. 7885423178, 0. 2169733074, 1. 2356050156  
 Si, 0, -2. 8984513238, -2. 0174648394, 1. 2953459698  
 Si, 0, -0. 6273668542, -3. 0383726057, 1. 4241665441  
 Si, 0, 3. 837816105, -1. 4051501668, -1. 7481136365  
 Ho, 0, -0. 9343635039, -0. 003556242, -0. 0334336497

## 18e

|    |                  |                  |                  |
|----|------------------|------------------|------------------|
| Si | 1. 263786663886  | 1. 256909172602  | 2. 656242536507  |
| Si | -1. 101377960678 | 1. 109372903335  | 2. 569949339566  |
| Si | 1. 103286588750  | -1. 107401918013 | 2. 569782225465  |
| Si | -1. 261826785185 | -1. 254932672686 | 2. 656054298583  |
| Si | 2. 222611184862  | 2. 209468726942  | 0. 627440435304  |
| Si | -2. 229517555140 | 2. 243951339990  | 0. 866682173896  |
| Si | 2. 231396684780  | -2. 242388483574 | 0. 866686182607  |
| Si | -2. 232259087205 | -2. 218299280977 | 0. 634811934312  |
| Si | 2. 955372487568  | -0. 100522039613 | -0. 226653126590 |
| Si | -2. 946586968484 | 0. 101559751362  | -0. 224448211281 |
| Si | 0. 084128013035  | -2. 946482149806 | -0. 224165914630 |
| Si | -0. 083507654391 | 2. 955598203188  | -0. 226599901355 |
| Si | 2. 379136870736  | -0. 639703073845 | -2. 453883193466 |
| Si | -2. 396269685645 | 0. 641214438032  | -2. 460869440330 |
| Si | 0. 627127685061  | -2. 399220908288 | -2. 460351290936 |
| Si | -0. 625236598843 | 2. 381628386102  | -2. 453592299602 |
| Si | 0. 856204815913  | 0. 850654534189  | -3. 542939630599 |
| Si | -0. 846309767706 | -0. 841340694521 | -3. 517971308418 |
| Ho | -0. 000158931321 | -0. 000066234419 | -0. 287945084918 |

## 19a

Si, 0, 1. 3100528672, -2. 2177232607, -1. 7745653421  
 Si, 0, 2. 5762690969, 1. 6961040181, -1. 8545416507  
 Si, 0, 2. 0814004001, 1. 7770326105, 1. 9314885717

Si, 0, 1. 0750842142, -2. 2003602392, 1. 8602036612  
Si, 0, -1. 6054183448, 2. 2907054411, 1. 7240728423  
Si, 0, -2. 8277240327, -1. 5533973856, 1. 8435136528  
Si, 0, -1. 1980381132, 2. 3472262873, -1. 8591344983  
Si, 0, -2. 4213164312, -1. 4042525616, -2. 1768716814  
Si, 0, -0. 0273627915, 1. 1131920605, 2. 9971317733  
Si, 0, 0. 4833735189, 1. 1918318874, -3. 0110895658  
Si, 0, -0. 2466039589, -1. 0566861752, -3. 0287389225  
Si, 0, -0. 6959351934, -1. 1828716603, 2. 9862944223  
Si, 0, 2. 6680501458, -0. 5361254835, 1. 2560258805  
Si, 0, -3. 2147936417, 0. 6956871113, 0. 9590181519  
Si, 0, -2. 9134904137, 0. 774399823, -1. 3530457029  
Si, 0, 2. 886126069, -0. 5999325239, -1. 0758364508  
Si, 0, -1. 9601650521, -2. 5487884448, -0. 154640462  
Si, 0, 0. 2482865809, -3. 3954530723, -0. 025077628  
Si, 0, -0. 1808431582, 3. 4653202956, 0. 1069563335  
Ho, 0, -0. 2322497615, -0. 1059817279, -0. 0377933849

19b

Si, 0, 2. 5971525115, -0. 1223253838, 1. 3190754298  
Si, 0, 4. 6536482256, 0. 0792513299, 0. 0271620188  
Si, 0, 2. 5955012088, -0. 1315568055, -1. 2730842241  
Si, 0, -4. 3832978116, 0. 9368486093, -1. 1220260317  
Si, 0, -4. 2273729344, -0. 7808474064, 1. 0593024836  
Si, 0, -5. 0290685268, -1. 4544426479, -1. 2811173331  
Si, 0, 1. 4714554699, 2. 0644185688, -1. 2417339067  
Si, 0, 1. 3291486016, -2. 0879699059, -2. 0001138442  
Si, 0, 1. 4209162835, -2. 1859153666, 1. 9214087062  
Si, 0, 1. 371714149, 2. 0174637907, 1. 3549049905  
Si, 0, -2. 5250979597, 2. 0110250577, 1. 128113391  
Si, 0, -2. 2894718087, -2. 1969462787, 1. 2900537412  
Si, 0, -2. 5553895315, -1. 7473800913, -1. 1650827779  
Si, 0, -2. 2995203493, 2. 1273507309, -1. 216291257  
Si, 0, -0. 4803350402, 1. 4748318945, -2. 5287038563  
Si, 0, -0. 7986876149, -1. 0131951302, -2. 897007645  
Si, 0, -0. 6269451104, -1. 1121859554, 2. 7272099148  
Si, 0, -0. 6758833934, 1. 3486881775, 2. 4800968608  
Si, 0, -4. 9782960597, 1. 56792288, 1. 2647291706  
Ho, 0, -0. 3126066645, -0. 174437572, -0. 0498695669

19c

Si, 0, 0. 6919839746, 1. 3401143086, 1. 054474765  
Si, 0, 2. 9851131941, 1. 8410236877, 1. 5196741471  
Si, 0, 0. 6506757941, -1. 30298736, 1. 0835868336  
Si, 0, 0. 5774581264, 1. 2180011357, -1. 7045004053  
Si, 0, -1. 208423875, 2. 8842985764, -1. 544975619

Si, 0, -3. 5180664555, 2. 1855468507, -1. 4326517741  
Si, 0, -3. 5854806121, -2. 0705708733, -1. 3865196912  
Si, 0, 2. 7851403782, 2. 092589227, -1. 0015610147  
Si, 0, -4. 6142957663, 0. 0736762871, -1. 4487153359  
Si, 0, -1. 2989454937, -2. 843692804, -1. 4825701158  
Si, 0, 0. 5376283593, -1. 2365460713, -1. 6781571188  
Si, 0, 2. 9280325599, -1. 8604824944, 1. 5620639921  
Si, 0, -1. 142548602, 3. 0829039791, 1. 0280791398  
Si, 0, -3. 4665862354, 2. 2364065599, 1. 0535307204  
Si, 0, -4. 5990387931, 0. 1007803068, 1. 114663805  
Si, 0, -3. 5323811615, -2. 0692065612, 1. 1000991886  
Si, 0, -1. 2361567675, -2. 9887017921, 1. 0941766762  
Si, 0, 2. 7151666446, -2. 1634394489, -0. 9531052284  
Si, 0, 3. 8189905705, -0. 0480073967, -0. 497799205  
Ho, 0, -1. 6902888395, 0. 0425298828, -0. 1021517595

19d

Si, 0, 0. 9445555957, 2. 8461280888, 1. 5251304533  
Si, 0, -1. 3097092828, 3. 2362125888, 0. 686647707  
Si, 0, -2. 4636836904, 1. 1794876829, 0. 2535629873  
Si, 0, -4. 1228195989, -0. 0433686253, 1. 8700475905  
Si, 0, -2. 037911068, -1. 120243078, 1. 4018542657  
Si, 0, 2. 9955009361, 1. 4250591219, 2. 4201011144  
Si, 0, -0. 700102649, -3. 021299695, 1. 0300463926  
Si, 0, 1. 6599523766, -2. 739882772, 1. 130826295  
Si, 0, 2. 0500151326, 3. 3188132047, -0. 65797039  
Si, 0, -0. 0872802074, 2. 6371450163, -1. 4288644794  
Si, 0, -1. 7558294388, 0. 8322025953, -2. 1912583348  
Si, 0, -1. 7275555744, -1. 5446147323, -1. 3735788724  
Si, 0, 3. 6158276981, 1. 636215346, 0. 0147490555  
Si, 0, -4. 0403878236, -0. 8923308472, -0. 5346088758  
Si, 0, -0. 9946676553, -3. 9310392705, -1. 3810808686  
Si, 0, 1. 2483753488, -2. 8604532784, -1. 2569568782  
Si, 0, 3. 1099415652, -0. 9449443082, 1. 61109562  
Si, 0, 2. 2458060692, -1. 1770450926, -2. 6271493762  
Si, 0, 3. 6277345972, -0. 574192874, -0. 7650690239  
Ho, 0, 0. 6002226693, 0. 1711049288, 0. 1603676181

20a

Si, 0, -1. 85362662, -1. 8583337648, -1. 8570895786  
Si, 0, -1. 9324318457, 1. 8638803307, -1. 8475032295  
Si, 0, 1. 85362662, 1. 8583337648, 1. 8570895786  
Si, 0, 1. 9324318457, -1. 8638803307, 1. 8475032295  
Si, 0, -1. 8702028545, 1. 7774042303, 1. 8339596868  
Si, 0, 1. 8873828987, 1. 8249853341, -1. 9217674862  
Si, 0, -1. 8873828987, -1. 8249853341, 1. 9217674862

Si, 0, 1. 8702028545, -1. 7774042303, -1. 8339596868  
Si, 0, 3. 0741063542, 1. 1041588957, -0. 0214141437  
Si, 0, -3. 4575828112, 1. 3346335287, 0. 0215741349  
Si, 0, -3. 0741063542, -1. 1041588957, 0. 0214141437  
Si, 0, 3. 4575828112, -1. 3346335287, -0. 0215741349  
Si, 0, 1. 3289061009, -0. 0230775088, -3. 4539262418  
Si, 0, 1. 1145192011, -0. 0141703543, 3. 0815384203  
Si, 0, -1. 3289061009, 0. 0230775088, 3. 4539262418  
Si, 0, -1. 1145192011, 0. 0141703543, -3. 0815384203  
Si, 0, 0. 0021710064, -3. 0185947507, 1. 1487162638  
Si, 0, 0. 0398978347, -3. 1771641079, -1. 2363221616  
Si, 0, -0. 0021710064, 3. 0185947507, -1. 1487162638  
Si, 0, -0. 0398978347, 3. 1771641079, 1. 2363221616  
Ho, 0, 0, 0, 0.

20b

Si, 0, 1. 1540650832, -1. 2797451898, -1. 3496694295  
Si, 0, -0. 6638835724, -2. 9784789847, -1. 3304026566  
Si, 0, -2. 9735622821, -2. 0911600916, -1. 323443206  
Si, 0, -4. 0313738118, 0. 0935090306, -1. 420250567  
Si, 0, -2. 8606431523, 2. 229761289, -1. 3200838125  
Si, 0, 3. 487009514, -1. 8998512827, -1. 1036117682  
Si, 0, -0. 522860168, 2. 9976402563, -1. 3001500992  
Si, 0, 1. 2303135557, 1. 2303875822, -1. 3730078658  
Si, 0, 1. 123295019, -1. 2419773934, 1. 4193627754  
Si, 0, -0. 7239849193, -2. 8445854939, 1. 2713990215  
Si, 0, -3. 034971992, -2. 087339755, 1. 163731546  
Si, 0, -2. 9933428519, 2. 2283732943, 1. 1666660579  
Si, 0, 3. 4692837525, -2. 1425458969, 1. 3376989109  
Si, 0, -4. 0838549689, 0. 0867665106, 1. 1500212424  
Si, 0, -0. 6584217986, 2. 9379947145, 1. 291216354  
Si, 0, 1. 1157862116, 1. 2509333332, 1. 4055085333  
Si, 0, 3. 6172931048, 1. 744308604, -1. 394946872  
Si, 0, 3. 4476081122, 2. 0448454712, 1. 0476464846  
Si, 0, 5. 2874146047, -0. 2151496718, -1. 7262269201  
Si, 0, 4. 6767514716, -0. 0556903719, 0. 6881727648  
Ho, 0, -1. 1259929121, 0. 0357980458, -0. 0729134939

20c

Si, 0, 0. 9734977063, -2. 0835396544, -2. 3054683726  
Si, 0, -1. 4173448756, -2. 2514395124, -2. 1098301877  
Si, 0, -2. 3722674931, 0. 1927334926, -2. 4848250877  
Si, 0, -1. 1034718788, 2. 2653504537, -2. 0128249949  
Si, 0, 1. 3481815154, 1. 9069846997, -2. 3118482347  
Si, 0, 2. 7773196976, -0. 121851852, -2. 1431645985  
Si, 0, -1. 3227746665, -1. 8525065005, 2. 2261779527

Si, 0, 1. 0004470178, -2. 3879381255, 1. 9233561273  
Si, 0, 2. 4964279957, -0. 2869155667, 2. 4898881481  
Si, 0, 1. 6792442049, 2. 0605951662, 1. 9769942453  
Si, 0, -0. 8019881057, 2. 0420746113, 2. 1456210088  
Si, 0, -2. 6172759898, 0. 3589647244, 2. 0657435767  
Si, 0, -2. 3745475672, -2. 7271553404, 0. 1187147267  
Si, 0, -3. 0879476087, -0. 4087881254, -0. 2255287088  
Si, 0, -1. 1889533906, 3. 4771998173, 0. 1353674629  
Si, 0, 1. 2613363681, 3. 0789197662, -0. 1925312972  
Si, 0, 3. 2760888595, -0. 6920812516, 0. 1750473692  
Si, 0, 2. 0995452792, -2. 8413919094, -0. 2254806353  
Si, 0, 0. 0914982551, -0. 084039462, 3. 4228873327  
Si, 0, 0. 0177004353, -0. 085026262, -3. 4956068638  
Ho, 0, 0. 0498382409, -0. 0427654691, -0. 0672087893
